# Supplementary material
Source: MDPI journal article supplement (https://www.mdpi.com/2297-8739/9/2/49)
Supplement: s1 [file s1]

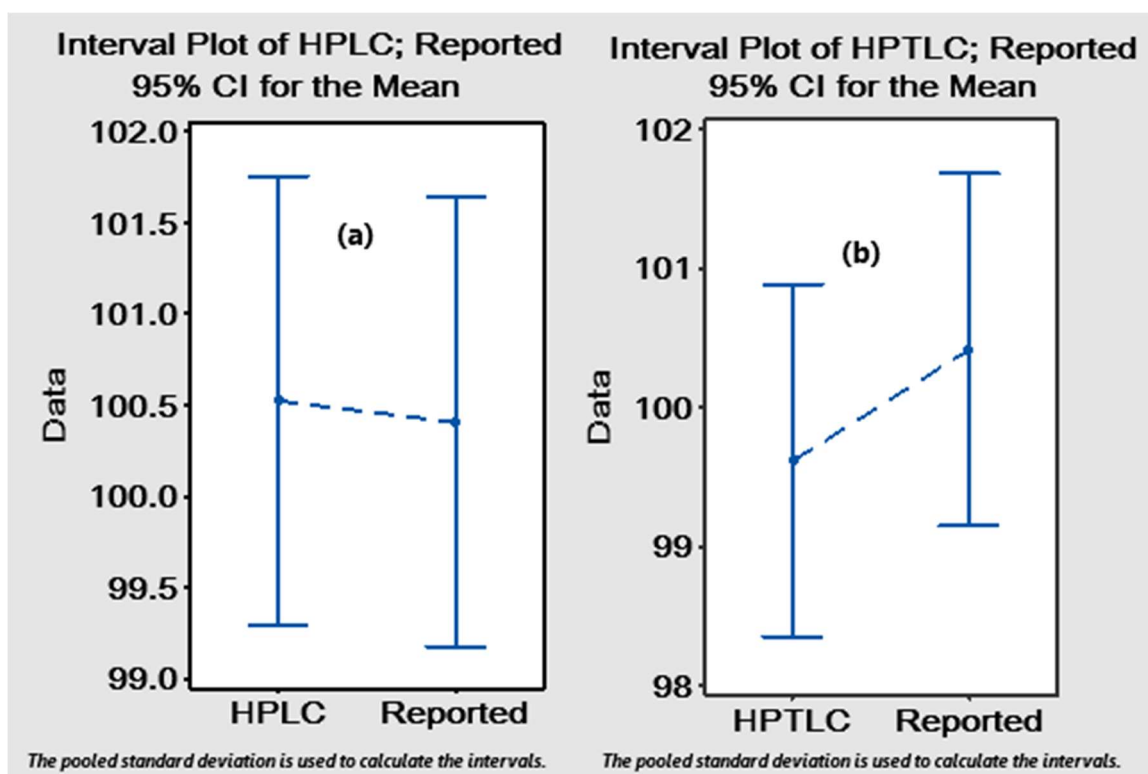

**Supplementary Figure S1:** Interval plot test for comparing the proposed (a) HPLC and (b) HPTLC methods to reported method in BP2017 monographs for determination of BHS in marketed dosage forms

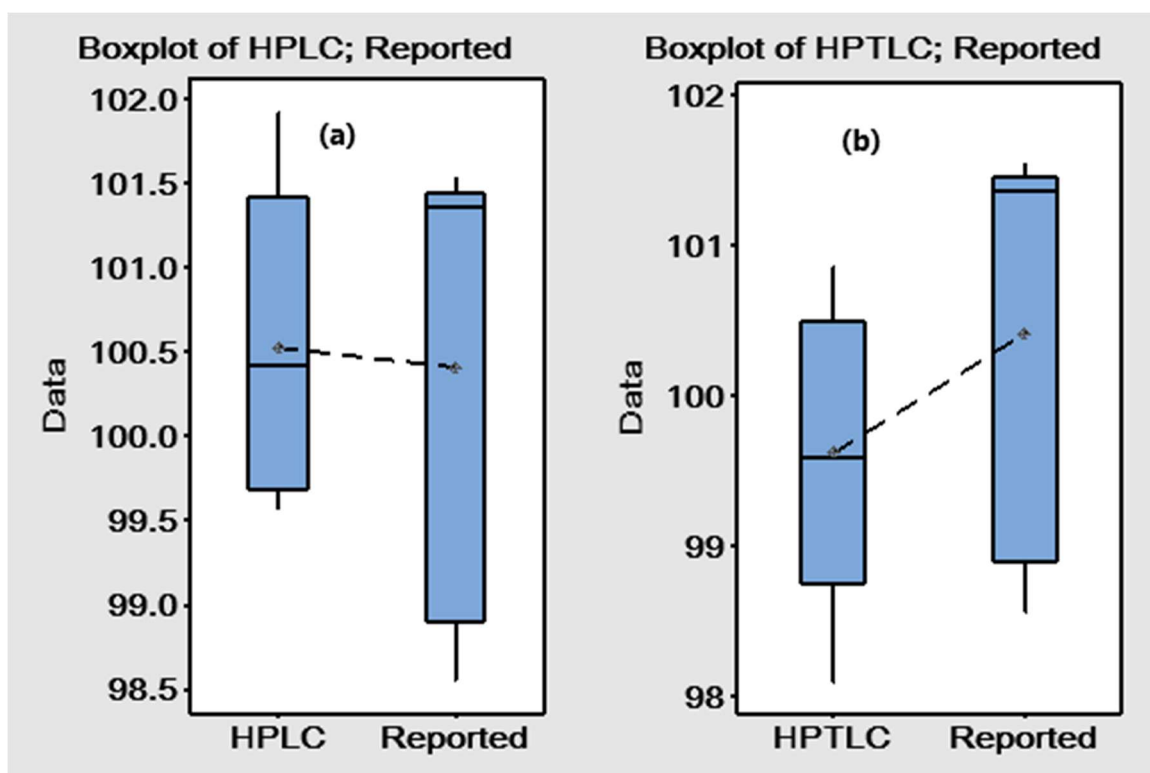

**Supplementary Figure S2:** Boxplot for comparing the proposed (a) HPLC and (b) HPTLC methods to reported method in BP2017 monographs for determination of BHS in marketed dosage forms

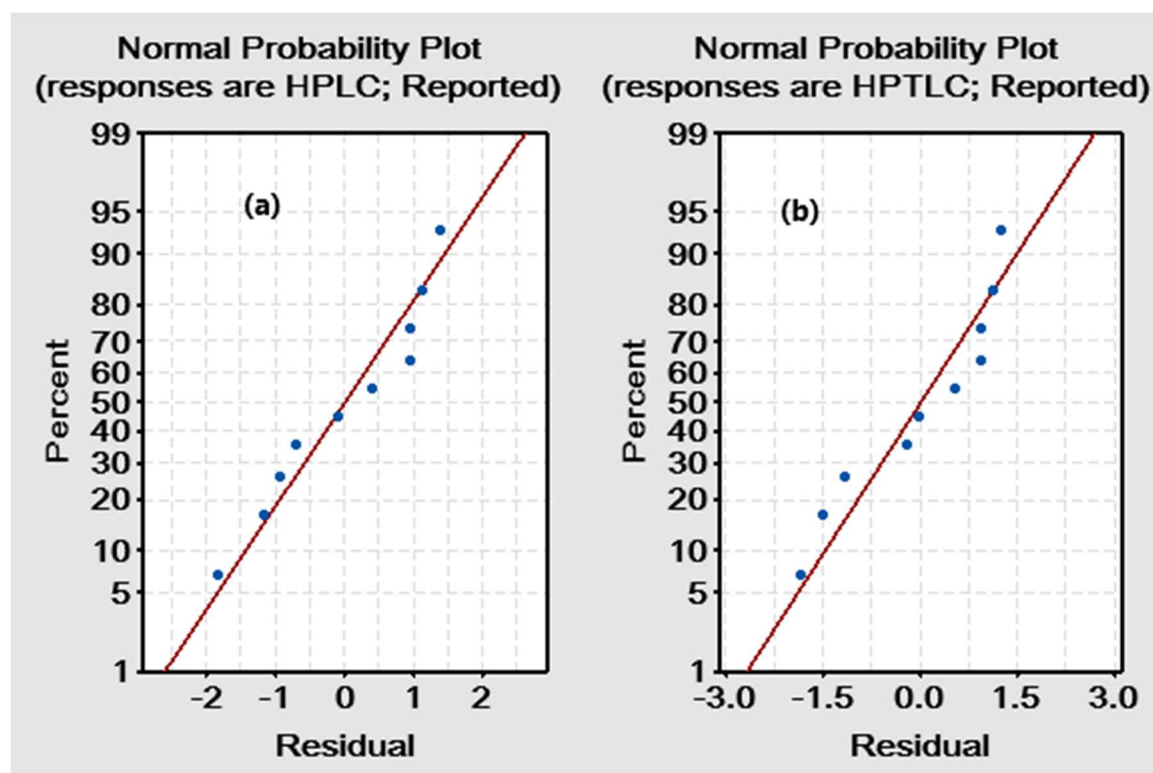

**Supplementary Figure S3:** Normal probability plot for comparing the proposed (a) HPLC and (b) HPTLC methods to reported method in BP2017 monographs for determination of BHS in marketed dosage forms
